# Supplementary material
Source: PubMed Central journal article supplement (PMC4788287)
Supplement: dixj872671.w1_default.pdf [file dixj872671.w1_default.pdf]

**web extra Table A**

**Variables and coefficients for 38 age and gender groups in the parsimonious model (model 5) for allocating funds to general practices in England for commissioning hospital care; predicting costs for 2007-8 using data from 2005-6 and 2006-7**

VARIABLES

| Males   | Age    | Coefficient | Standard error |
|---------|--------|-------------|----------------|
|         | 0-4    | -2.837607   | 7.216762       |
|         | 5-9    | -14.76266   | 6.553032       |
|         | 10-14  | 4.927254    | 6.399355       |
|         | 15-19  | -2.277888   | 6.302914       |
|         | 20-24  | -21.60741   | 6.343273       |
|         | 25-29  | -28.24072   | 6.214987       |
|         | 30-34  | -21.12157   | 6.146218       |
|         | 40-44  | 25.99174    | 5.932032       |
|         | 45-49  | 68.61799    | 6.116961       |
|         | 50-54  | 124.4175    | 6.381449       |
|         | 55-59  | 195.0397    | 6.39882        |
|         | 60-64  | 317.4234    | 6.594575       |
|         | 65-69  | 458.7142    | 7.244069       |
|         | 70-74  | 637.9268    | 7.70132        |
|         | 75-79  | 755.7106    | 8.465766       |
|         | 80-84  | 917.9422    | 9.946049       |
|         | 85plus | 1028.741    | 11.72016       |
| Females |        |             |                |
|         | 0      | 105.8439    | 13.91832       |
|         | 1-4    | -29.59611   | 7.311823       |
|         | 5-9    | -29.9097    | 6.636175       |
|         | 10-14  | -3.603591   | 6.491816       |
|         | 15-19  | 2.537811    | 6.376198       |
|         | 20-24  | 1.87126     | 6.371866       |
|         | 25-29  | 20.46065    | 6.29132        |
|         | 30-34  | 47.02554    | 6.348795       |
|         | 35-39  | 70.62631    | 6.108445       |
|         | 40-44  | 91.06077    | 6.050389       |
|         | 45-49  | 126.6784    | 6.242691       |
|         | 50-54  | 169.0104    | 6.474054       |
|         | 55-59  | 204.3607    | 6.444694       |
|         | 60-64  | 276.3352    | 6.609957       |
|         | 65-69  | 384.5436    | 7.147478       |
|         | 70-74  | 526.1845    | 7.408503       |
|         | 75-79  | 641.6834    | 7.754103       |
|         | 80-84  | 765.3426    | 8.452696       |
|         | 85plus | 942.5387    | 8.530715       |

## Web extra Table B

**Variables and coefficients for 150 ICD10 categories in the parsimonious model (model 5) for allocating funds to general practices for commissioning hospital care; predicting costs for 2007/8 using data from 2006/07 and 2005/06**

| ICD10 group | Coefficient | Standard error |
|-------------|-------------|----------------|
| A00-A09     | 90.06332    | 18.46232       |
| A15-A19     | 856.4994    | 71.13082       |
| A20-A49     | 606.1808    | 23.47977       |
| A50-A64     | 288.8258    | 63.72727       |
| A65-A79     | -187.7902   | 155.7775       |
| A80-A89     | 253.9401    | 87.0676        |
| A90-A99     | -1146.793   | 683.3094       |
| B00-B09     | 331.2766    | 35.61085       |
| B15-B19     | 934.2287    | 46.57808       |
| B20-B24     | 465.5096    | 81.43077       |
| B25-B34     | 91.65267    | 19.23381       |
| B35-B49     | 354.9364    | 32.80403       |
| B50-B64     | -262.6732   | 113.0167       |
| B65-B83     | -70.71069   | 134.0483       |
| B85-B99     | 288.7485    | 13.33231       |
| C00-C14     | 1239.007    | 65.58053       |
| C15-C26     | 1179.779    | 24.37271       |
| C30-C39     | 978.9933    | 38.78725       |
| C40-C41     | 2349.293    | 148.2697       |
| C43-C44     | 243.8436    | 18.68881       |
| C45-C49     | 1493.273    | 80.62055       |
| C50         | 561.5776    | 23.12502       |
| C51-C58     | 1043.226    | 39.26259       |
| C60-C63     | 380.9204    | 24.88022       |
| C64-C68     | 1022.185    | 27.02631       |
| C69-C72     | 2372.248    | 74.7969        |
| C73-C80     | 1001.88     | 23.77566       |
| C81-C96     | 3217.124    | 27.94073       |
| D00-D48     | 153.2599    | 9.319139       |
| D50-D64     | 598.8652    | 11.40667       |
| D65-D89     | 1396.196    | 20.87762       |
| E00-E07     | 42.41733    | 12.84832       |
| E10-E14     | 540.6326    | 8.918762       |
| E15-E90     | 239.5013    | 8.4478         |
| F00-F03     | -435.6711   | 21.83248       |
| F04-F09     | -15.78911   | 47.70051       |
| F10-F19     | 226.2958    | 13.97361       |
| F20-F29     | -48.74866   | 26.06382       |
| F30-F39     | 92.61795    | 15.41737       |
| F40-F69     | 189.4276    | 20.91028       |

|         |     |           |          |
|---------|-----|-----------|----------|
| F70-F79 |     | 131.4332  | 68.22387 |
| F80-F99 |     | 382.925   | 26.68207 |
| G00-G09 |     | 731.8269  | 59.63883 |
| G10-G13 | G30 | 99.68474  | 28.3413  |
| G20-G26 |     | 916.5344  | 28.42671 |
| G35-G37 |     | 904.5205  | 35.6576  |
| G40-G59 |     | 360.56    | 10.16479 |
| G60-G73 | G90 | 1229.113  | 22.75139 |
| G80-G83 |     | 436.5887  | 23.58485 |
| H00-H06 | H15 | 297.9881  | 10.9414  |
| H10-H13 |     | 108.2158  | 43.71006 |
| H25-H28 |     | 92.19613  | 10.1194  |
| H40-H42 |     | -7.507016 | 24.91423 |
| H60-H95 |     | 178.3281  | 14.00017 |
| I00-I09 |     | 624.9734  | 38.48602 |
| I10-I15 |     | 121.2449  | 6.464917 |
| I20-I25 |     | 247.1833  | 8.22918  |
| I26-I28 |     | 293.9958  | 27.79348 |
| I30-I52 |     | 312.4197  | 8.773164 |
| I60-I69 |     | 26.83616  | 15.88766 |
| I70-I79 |     | 908.4265  | 16.35399 |
| I80-I89 |     | 162.3807  | 11.38124 |
| I95-I99 |     | 176.0058  | 22.82816 |
| J00-J06 |     | 105.3072  | 13.44082 |
| J10-J18 |     | 133.5136  | 15.44976 |
| J20-J22 |     | 359.6564  | 13.11339 |
| J30-J39 |     | 69.70446  | 13.12617 |
| J40-J47 |     | 289.933   | 7.2085   |
| J60-J70 |     | 263.2993  | 48.36898 |
| J80-J99 |     | 564.5244  | 16.1667  |
| K00-K14 |     | 121.3328  | 10.50818 |
| K20-K31 |     | 182.7763  | 8.794258 |
| K35-K38 |     | -93.49164 | 23.45429 |
| K40-K46 |     | 10.22723  | 9.46867  |
| K50-K52 |     | 355.0034  | 10.83271 |
| K55-K63 |     | 185.9307  | 7.918644 |
| K65-K67 |     | 720.9288  | 33.30565 |
| K70-K77 |     | 1050.535  | 24.59535 |
| K80-K87 |     | 193.0653  | 13.9179  |
| K90-K93 |     | 326.2565  | 17.29949 |
| L00-L14 | L55 | 221.39    | 8.968117 |
| L20-L30 |     | 60.20312  | 25.29883 |
| L40-L45 |     | 653.9857  | 36.61462 |
| L50-L54 |     | 176.9936  | 48.20115 |
| M00-M25 |     | 438.6863  | 6.899808 |
| M30-M36 |     | 924.5474  | 27.90648 |

|              |  |           |          |
|--------------|--|-----------|----------|
| M40-M54      |  | 406.4439  | 10.38885 |
| M60-M79      |  | 223.7077  | 10.41787 |
| M80-M94      |  | 456.0484  | 14.98874 |
| M95-M99      |  | 133.5732  | 56.87662 |
| N00-N08 N10  |  | 2145.179  | 21.46452 |
| N17-N19      |  | 4112.188  | 17.31805 |
| N20-N23      |  | 5.245619  | 21.66702 |
| N25-N29      |  | 1555.411  | 35.3698  |
| N30-N39      |  | 51.83272  | 9.865776 |
| N40-N51      |  | -93.2636  | 12.45076 |
| N60-N64      |  | 80.22275  | 27.57918 |
| N70-N77      |  | -35.46077 | 21.82715 |
| N80-N98      |  | 43.93436  | 9.057993 |
| N99          |  | -349.0277 | 62.39908 |
| O00-O08      |  | 45.83916  | 13.34272 |
| O10-O75 O850 |  | -34.34077 | 9.170204 |
| O80-O84      |  | 13.10919  | 14.62183 |
| P00-P04      |  | 36.30158  | 39.0333  |
| P05-P96      |  | 107.3882  | 13.43691 |
| Q00-Q89      |  | 722.3476  | 13.56088 |
| Q90-Q99      |  | 1080.782  | 56.90942 |
| R00-R09      |  | 208.102   | 7.382141 |
| R10-R19      |  | 166.5038  | 6.819706 |
| R20-R23      |  | 72.82151  | 17.63455 |
| R25-R29      |  | 99.33806  | 22.47827 |
| R30-R39      |  | 100.3558  | 11.27915 |
| R40-R46      |  | 63.26197  | 15.35036 |
| R47-R49      |  | 138.487   | 33.76603 |
| R50-R68      |  | 271.353   | 8.058152 |
| R69          |  | 354.4385  | 9.647755 |
| R70-R89      |  | 235.0259  | 18.56281 |
| R90-R94      |  | 217.998   | 20.11801 |
| R95-R99      |  | (omitted) |          |
| S00-S09      |  | 66.40014  | 14.36618 |
| S10-S19      |  | 421.961   | 50.28438 |
| S20-S29      |  | 86.36491  | 32.97416 |
| S30-S39      |  | -27.05497 | 26.82312 |
| S40-S49      |  | 101.3158  | 24.2977  |
| S50-S59      |  | -10.20643 | 19.13422 |
| S60-S69      |  | -6.232585 | 18.64903 |
| S70-S79      |  | -72.41004 | 20.72658 |
| S80-S89      |  | 93.82428  | 19.06486 |
| S90-S99      |  | 32.30689  | 34.35012 |
| T00-T07      |  | 163.5215  | 79.75891 |
| T08-T14      |  | 5.143045  | 50.01272 |
| T15-T19      |  | 39.41025  | 42.93366 |

|         |  |           |          |
|---------|--|-----------|----------|
| T20-T32 |  | -26.7226  | 51.63167 |
| T33-T35 |  | 1063.151  | 730.4869 |
| T36-T50 |  | -49.88365 | 24.47844 |
| T51-T65 |  | -12.21528 | 31.43413 |
| T66-T78 |  | 197.3466  | 38.19278 |
| T79     |  | -131.1473 | 70.85636 |
| T80-T88 |  | 1035.76   | 13.46865 |
| T90-T98 |  | 7.836875  | 32.09963 |
| Z00-Z13 |  | 82.48817  | 8.859086 |
| Z20-Z29 |  | 276.7182  | 19.39524 |
| Z30-Z39 |  | -86.4235  | 7.563937 |
| Z40-Z54 |  | 858.6198  | 7.656976 |
| Z55-Z65 |  | 61.65061  | 16.27018 |
| Z70-Z76 |  | 63.26201  | 8.727597 |
| Z80-Z99 |  | 248.0814  | 5.454725 |
| UUU     |  | (omitted) |          |
| VVV     |  | 3.073728  | 22.80567 |
| WWW     |  | 26.44099  | 12.31637 |
| XXX     |  | 109.6661  | 18.88173 |
| YYY     |  | 64.00524  | 11.82603 |
